# Supplementary material
Source: PubMed Central journal article supplement (PMC2555953)
Supplement: E08-04-0341_1.pdf [file E08-04-0341_1.pdf]

## Online Supplemental Material

**Figure S1.** Colocalization of *AtMAP65-1* and *AtMAP65-5* with microtubule bundles observed by fluorescent microscopy. Rhodamine-labelled taxol-stabilized MTs (1 $\mu$ M) were incubated in the presence of GFP-*AtMAP65-1* (a, b, c) and GFP-*AtMAP65-5* (d, e, f) at 0.5  $\mu$ M for 20 min at room temperature. (a, b) observations in the rhodamine channel, (b, e) observations in the GFP channel and (c, f) merge of the rhodamine and GFP images. Bar: 10  $\mu$ m.

**Figure S2.** Identification of the MT binding domain of *AtMAP65-1* and *AtMAP65-5*. Co-sedimentation of 1  $\mu$ M of *AtMAP65-1* (**A**) and *AtMAP65-5* (**B**) constructs with MTs (5  $\mu$ M) *in vitro*. *AtMAP65-1* and -5, *AtMAP65(2)*, *AtMAP65(3)*, *AtMAP65(23)*, *AtMAP65(13)*, *AtMAP65-5( $\Delta$ 3C)* and *AtMAP65(3C)* were centrifuged at high speed and protein content of pellets (P) and supernatant (S) were analysed on western blot probed with anti-*AtMAP65-1* or anti-*AtMAP65-5*. Only the constructs *AtMAP65(2)* and *AtMAP65(3C)* did not sedimented with MTS. These data demonstrate that the MT binding domain is located within the domain 3N for both *AtMAP65-1* and *AtMAP65-5*.

**Figure S3.** Tubulin assembly *in vitro*. Time-course assembly of tubulin (15  $\mu$ M) followed at 350 nm in the presence of various concentrations of *AtMAP65-1* (top-left panel), *AtMAP65-1( $\Delta$ 3C)* (top-right panel), *AtMAP65-5* (bottom-left panel), and *AtMAP65-5( $\Delta$ 3C)* (bottom-right panel).

**Video 1.** Tobacco BY-2 cells expressing *AtMAP65-5*-GFP and RFP-TUA6 undergoing from prophase to telophase. The movie corresponds to the merged of RFP and GFP images

(confocal microscopy). This movie is from experiment shown in Figure 7A. Frames were collected every 3 min and the video is shown at 30msec/frames.

**Video 2.** Tobacco BY-2 cells expressing *AtMAP65-5-GFP* and RFP-TUA6 undergoing division from prophase to telophase. The movie corresponds to the merged RFP and GFP images (confocal microscopy). This movie is from experiment shown in Figure 6B. Frames were collected every 3 min and the video is shown at 30msec/frame.

**Video 3.** Tobacco BY-2 cells expressing *AtMAP65-1-GFP* and RFP-TUA6 undergoing division from metaphase to telophase. The movie corresponds to the merged RFP and GFP images (confocal microscopy). This movie is from experiments shown in Figure 7B. Frames were collected every 3 min and the video is shown at 30msec/frame.

**Table I.** Sequences of the primers used for cloning *AtMAP65s*.

## **Supplementary Material and Methods**

### ***Expression and purification of recombinant MAP65s***

His-*AtMAP65s*-His proteins were expressed for 16h at 22°C in Rosetta (DE3)pLysS bacteria strain (Novagen-Merck Biosciences) by induction with 0.5 mM IPTG. After induction, cells were suspended in cold lysis buffer (50 mM NaPi, 0.1 M NaCl, 0.5 mM DTT, 0.5% TritonX100, 30 mM Imidazole, pH 7.9), containing protease inhibitors (complete, EDTAfree, Roche) and sonicated. Cell lysate was centrifuged at 30,000g for 30 min and applied to Ni Sepharose columns (Amersham Bioscience). Columns were washed with protein wash buffer

(50 mM NaPi, 0.1 M NaCl, 0.5 mM DTT, 0.12 M Imidazole, pH 7.9). Proteins were eluted with 0.5 M Imidazole, and dialyzed overnight against the dialysing buffer (50 mM NaPi, 0.1 M NaCl, 0.5 mM DTT). To purified His-*At*MAP65s-GFP proteins, the same protocol was applied except that the protein wash buffer contained 30 mM Imidazole and the proteins were eluted with 0.5 M Imidazole. The affinity purification was followed by a gel filtration chromatography in 50 mM NaPi, 0.1 M NaCl, 0.5 mM DTT, pH 7.9. Purified *At*MAP65s were frozen in liquid nitrogen in the presence of 10% of glycerol and store at  $-80^{\circ}\text{C}$ . Recombinant proteins were analyzed on a 10% SDS-PAGE slab gel stained with Coomassie Brilliant Blue R-250 (Sigma-Aldrich). The amount of protein was evaluated by scanning the gel with NIH IMAGE software (<http://rsb.info.nih.gov/nih-image/>), with actin as standard protein.

### ***Oligomerization determination***

Corrected  $s_{20,w}$  sedimentations coefficients were derived from  $s$ :  $s_{20,w}=s ((1-0.99828\bar{v}) / (1-\rho\bar{v}))(\eta/1.002)$ . The partial specific volume of the proteins were estimated from the sequence  $\bar{v}=0.730\pm 0.002 \text{ mL.g}^{-1}$ ; the solvent density was measured:  $\rho=1.039 \pm 0.001 \text{ mL.g}^{-1}$ . Theoretical calculations were made with the Svedberg equation:  $s = M (1 - \rho \bar{v}) / (N_A 6 \pi \eta R_H)$  with  $R_H = (f/f_{\min}) R_{\min}$ .  $N_A$  Avogadro's number,  $R_{\min}$  is the radius corresponding to the volume of a molecule;  $(f/f_{\min})$  is the frictional ratio.  $(f/f_{\min})$  is 1.25 for globular proteins For the range of our molar mass, we derive  $(f/f_{\min})\sim 2.5$  for coil-like- and  $(f/f_{\min})\sim 1.7$  for premolten globule-like- unfolded proteins (Ebel, 2007). For gel filtration chromatography, the column was calibrated by both high and low molecular weight standards (Amersham Biosciences).

### ***Details of the methodology employed for microtubule polarity analysis***

Because of the distorsion of the MTs (that we may not control), the computation of the filtered

images using the  $J_0$  and  $J_N$  terms in the Fourier transform of the images shows blurry features. To avoid this artefact we had to compute filtered images for the straightest part of MTs, and statistically only small portions of MTs are straight in most cases. Furthermore, MTs in presence of *AtMAP65s* involve the formation of MTs bundles in 3D. That means that MTs in interaction with *AtMAP65s* in (only) "2D" is a rare phenomenon (see Figure 5Ab and 5Bb). During this study over 210 images of MT bundles induced by *AtMAP65-1* were recorded and only 17 MTs in interaction with *AtMAP65-1* and without any overlap in the third dimension (less than 10%) could be analyzed; for MT bundles induced by *AtMAP65-5*, 330 images were recorded, 38 of those showed MTs in interaction with *AtMAP65-5* without any overlap in the third dimension (a little bit more than 10% in this case). Once these images were selected, and before applying the method for the polarity determination, we had to ensure that MTs were really in interaction with *AtMAP65s* (and that they are not just undecorated MTs) by performing a Fourier transform of a part of the area of interest. If an extra layer-line at  $\sim 1/8$  nm appeared, it confirmed the binding of *AtMAP65s* (see Figure 5Ae and Be). If no extra layer-line was visible, either MT was undecorated or the signal was lost in the noise (cryo-EM images have a very poor signal to noise ratio). Taking into account these last restrictive experimental conditions and in order to apply the method described by Chrétien et al., (1996) we furthermore had to select MTs with a number of protofilaments which was not 13, MTs with 13 protofilaments representing more than 70% of our MTs population. In conclusion, we determined the polarity of 5 MTs interacting with *AtMAP65-1* over the 17 first selected images and 4 over the 38 selected images for *AtMAP65-5* as presented in Figure 5Ab-e (i.e evidence of the binding of *AtMAP65-1* and at least 2 neighbouring MTs with a number of protofilaments different from 13).

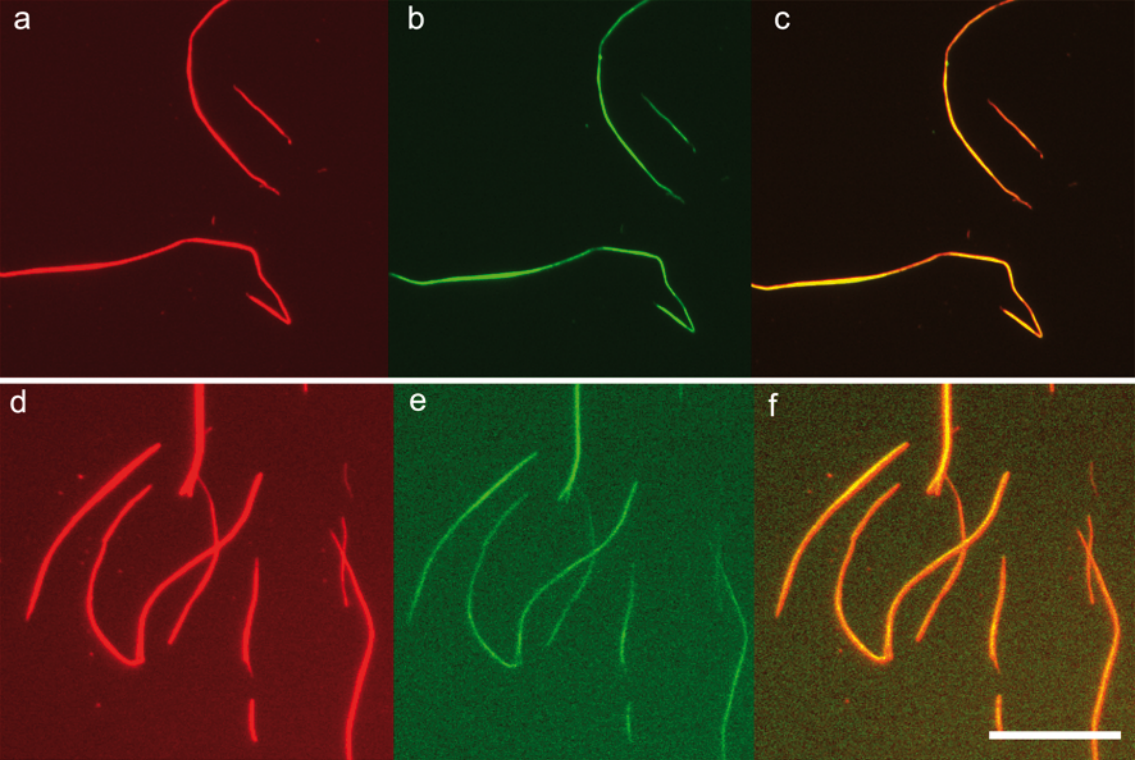

Figure S1

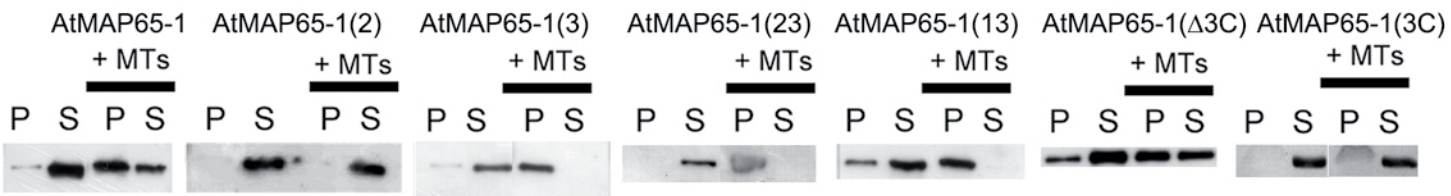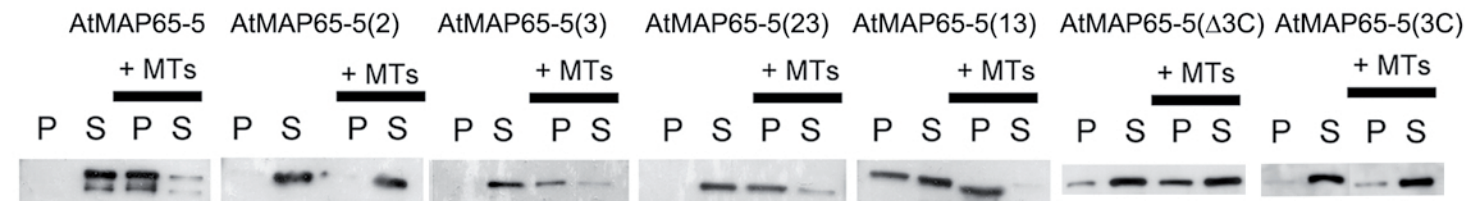

Figure S2

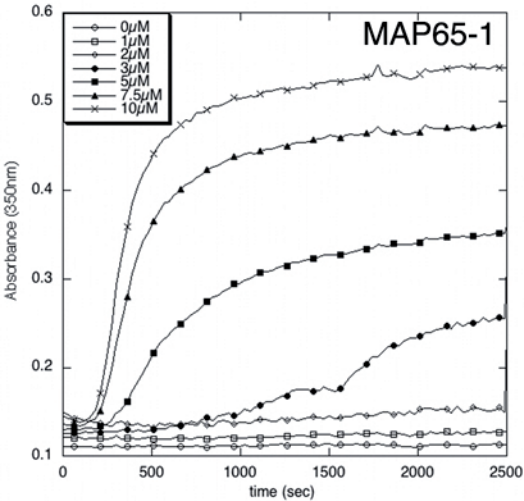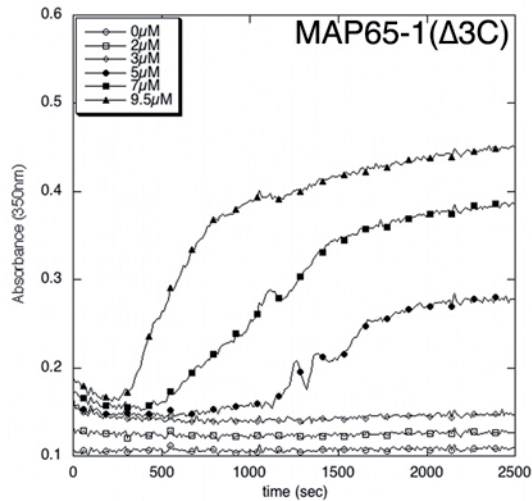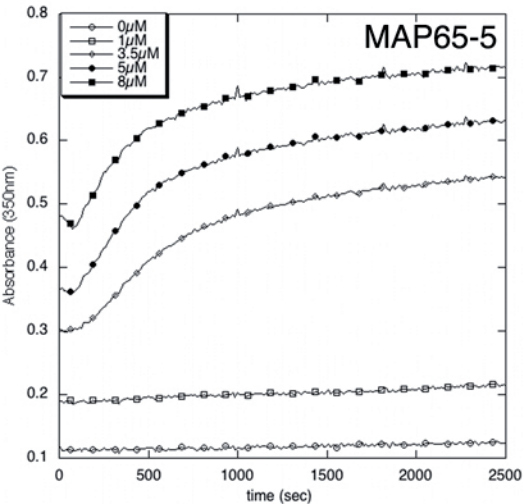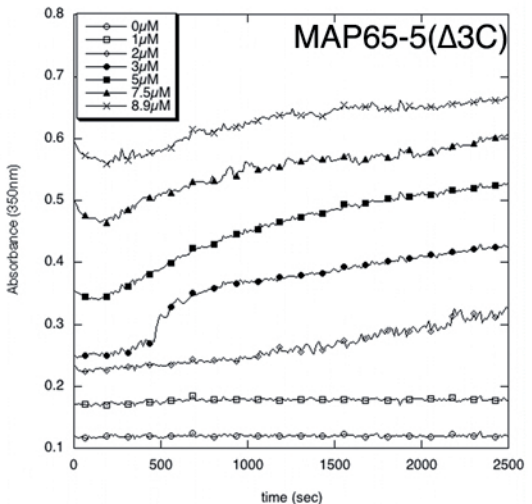

Figure S3

Table I

| Clone                         | Sequence of the primers                                                                                                                                                                                                                                                                                                                                                                                                                                                       |
|-------------------------------|-------------------------------------------------------------------------------------------------------------------------------------------------------------------------------------------------------------------------------------------------------------------------------------------------------------------------------------------------------------------------------------------------------------------------------------------------------------------------------|
| <i>At</i> MAP65-1(2)          | ForM65-1(2) CACCGATGAGTCTGATTTGTCACTGAAGA<br>RevM65-1(2) TTCCGGGTAACTTCTACATGGGC                                                                                                                                                                                                                                                                                                                                                                                              |
| <i>At</i> MAP65-1(3)          | ForM65-1(3) CACCTCTGCTCGTGAGAGAATCATGT<br>RevM65-1 TGGTGAAGCTGGAACCTTGATGAT                                                                                                                                                                                                                                                                                                                                                                                                   |
| <i>At</i> MAP65-1(23)         | ForM65-1(2)<br>RevM65-1                                                                                                                                                                                                                                                                                                                                                                                                                                                       |
| <i>At</i> M65-1(13)           | 1 <sup>st</sup> PCR to amplify the domain 1:<br>ForM65.1 CACCATGGCAGTTACAGATACTGAAAG<br>RevM65-1(13int)<br><u>TCTCTCACGAGCAGAGACTATAGGAACCTCATTGCTCA</u><br>2 <sup>nd</sup> PCR to amplify the domain 3<br>ForM65-1(13int)<br><u>GAGGTTCCCTATAGTCTCTGCTCGTGAGAGAATCATGT</u> RevM65-1<br>3 <sup>rd</sup> PCR to join the two domains with primers ForM65-1 and RevM65-1,<br>taking advantage of the overlapping region introduced during the first<br>amplification.           |
| <i>At</i> M65-1( $\Delta$ 3C) | ForM65.1<br>RevM65.1(D3C) TCTTGCAGGGCTTGGCCTGGT                                                                                                                                                                                                                                                                                                                                                                                                                               |
| <i>At</i> M65-1(3C)           | ForM65.1(3C) CACCCACAGCATGTCCTTTGCCTA<br>RevM65.1                                                                                                                                                                                                                                                                                                                                                                                                                             |
| <i>At</i> M65-1(3N)           | ForM65.1(3) and RevM65.1(D3C)                                                                                                                                                                                                                                                                                                                                                                                                                                                 |
| <i>At</i> MAP65-5(2)          | ForM65-5(2) CACCGAAGTTGATGAAAGTGACTTGACACA<br>RevM65-5(2) GATATCCATATGATTCCCTCTGCA-3'                                                                                                                                                                                                                                                                                                                                                                                         |
| <i>At</i> MAP65-5(3)          | ForM65-5(3) CACCAATAGTGATGCTGCAAGAAAGAGTCT<br>RevM65-5 ATCGTCTTTCTGAAGAGCAACATA                                                                                                                                                                                                                                                                                                                                                                                               |
| <i>At</i> MAP65-5(23)         | ForM65-5(2) and RevM65-5.                                                                                                                                                                                                                                                                                                                                                                                                                                                     |
| <i>At</i> MAP65-1(13)         | 1 <sup>st</sup> PCR to amplify the domain 1<br>ForM65-5 CACCATGTCTCCGTCTTCAACCACTA<br>RevM65-5(13int)<br><u>TGCAGCATCACTATTTGAACCAGAACTAACAGTATAATCATTCC</u><br>2 <sup>nd</sup> PCR to amplify the domain 3<br>ForM65-5(13int)<br><u>GTTAGTTCTGGTTCAAATAGTGATGCTGCAAGAAAGAGTCT</u><br>RevM65-5<br>3 <sup>rd</sup> PCR to join the two domains with primers ForM65-5 and RevM65-5,<br>taking advantage of the overlapping region introduced during the first<br>amplification. |
| <i>At</i> M65-5( $\Delta$ 3C) | ForM65.5<br>RevM65.1(D3C) AGACTTGGAACCATACTTTGCTTCTTTC                                                                                                                                                                                                                                                                                                                                                                                                                        |
| <i>At</i> M65-5(3C)           | ForM65.5(3C) CACCAGAGGGGTCCCCTTCTTATGC<br>RevM65.5                                                                                                                                                                                                                                                                                                                                                                                                                            |
| <i>At</i> M65-5(3N)           | ForM65.5(3) and RevM65.5(D3C)                                                                                                                                                                                                                                                                                                                                                                                                                                                 |
